# Supplementary material for: Microparticles of phosphonate-functionalized copolymers and their composites with CdTe nanocrystals prepared by sonication-precipitation
Source: Royal Society of Chemistry journal article supplement (doi:10.1039/c1py00337b), 2011-01-01
Supplement: c1py00337b.pdf [file c1py00337b.pdf]

---

## Electronic Supporting Information

for the manuscript

# Microparticles of phosphonate-functionalized copolymers and their composites with CdTe nanocrystals prepared by sonication-precipitation

5

Ioannis Kanelidis,<sup>a</sup> Ozcan Altintas,<sup>a,f</sup> Jan-Christoph Gasse,<sup>b</sup> Ronald Frahm,<sup>b</sup> Alexander Eychmüller,<sup>c</sup>  
Elisabeth Holder<sup>\*a,d</sup>

<sup>a</sup>Functional Polymers Group and Institute of Polymer Technology, University of Wuppertal, Gaußstr. 20, D-42097  
10 Wuppertal, Germany.

<sup>b</sup>Experimental Physics, University of Wuppertal, Gaußstr. 20, D-42097 Wuppertal, Germany.

<sup>c</sup>Physical Chemistry/Electrochemistry, TU Dresden, Bergstr. 66b, D-01062 Dresden, Germany.

15 <sup>d</sup>Dutch Polymer Institute (DPI), P.O. Box 513, NL-5600 AX Eindhoven, The Netherlands.

<sup>f</sup>Current address: Preparative Macromolecular Chemistry, Institute for Chemical Technology and Polymer Chemistry,  
Karlsruhe Institute of Technology (KIT), Engesserstr. 18, D-76128 Karlsruhe, Germany.

20

Tel: +49-202-439-3879

Fax: +49-202-439-3880;

E-mail: [holder@uni-wuppertal.de](mailto:holder@uni-wuppertal.de)

### 25 Table of Contents

|                                       |   |
|---------------------------------------|---|
| Stability trials                      | 1 |
| Dynamic light scattering measurements | 3 |

### Stability trials

30

Dispersions of the polymers **3,4b** in combination to red-emitting CdTe nanocrystals were prepared according to the precipitation-sonication procedure. Polymers of  $10^{-4}$  mol/L concentration were used, while the CdTe concentration was varied from  $1 \times 10^{-5}$  to  $6 \times 10^{-5}$  mol/L. Each time 1 mL of the dispersions was subjected to centrifugation applying different time intervals and centrifugation velocities. Subsequently, the optical characterization of the supernate and the precipitate were investigated by means of fluorescence  
35 spectrophotometry. Table S1 shows the experimental parameters applied during centrifugations when the  $6 \times 10^{-5}$  mol/L CdTe concentration was utilized while a single experiment was performed for the  $10^{-5}$  mol/L nanocrystal concentration (3 min, 14500 rpm). Figures S1 and S2 illustrate the emission of the supernates and precipitates of composites **3b**+CdTe and **4b**+CdTe respectively for the highest nanocrystal concentration ( $6 \times 10^{-5}$  mol/L). The experiment with the lower nanocrystal concentration is exemplarily shown in figure S3 for the composite with polymer **3b**.

40

**Table S1.** Experimental parameters of the centrifugation trials.

| 3b+CdTe    |                | 4b+CdTe    |                |
|------------|----------------|------------|----------------|
| Time (min) | Velocity (rpm) | Time (min) | Velocity (rpm) |
| 1          | 1600           | 1          | 1600           |
| 1          | 3000           | 1          | 3000           |
| 1          | 6000           | 1          | 6000           |
| 1          | 10000          | 1          | 10000          |
| 1          | 13000          | 1          | 13000          |
| 3          | 13000          | 3          | 13000          |

5

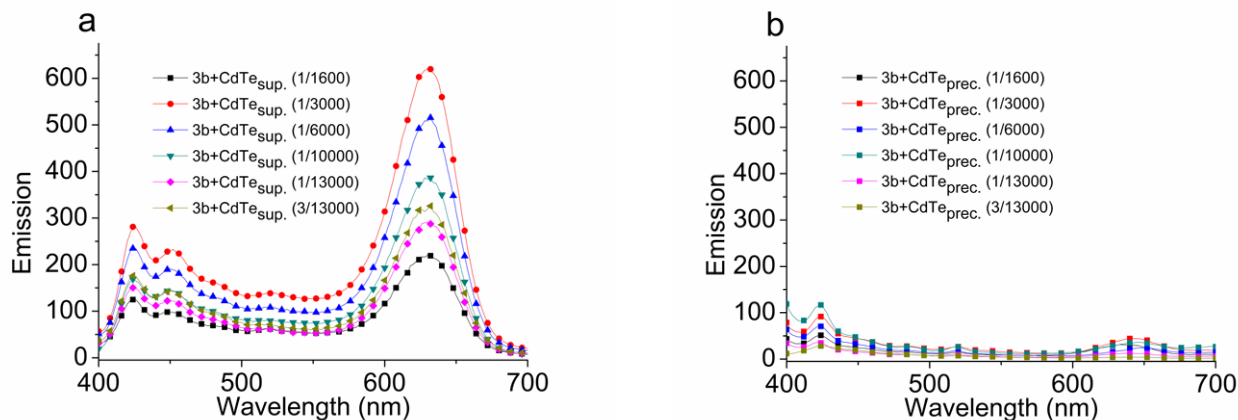

**Figure S1.** Fluorescence spectra of the supernate (a) and the precipitate (b) of the **3b**+CdTe systems ( $C_{3b}$ :  $10^{-4}$  mol/L and  $C_{CdTe}$ :  $6 \times 10^{-5}$  mol/L,  $\lambda_{exc}$ : 380 nm) which were prepared by the precipitation-sonication procedure, followed by centrifugation at different time intervals and velocities (see Table S1).

10

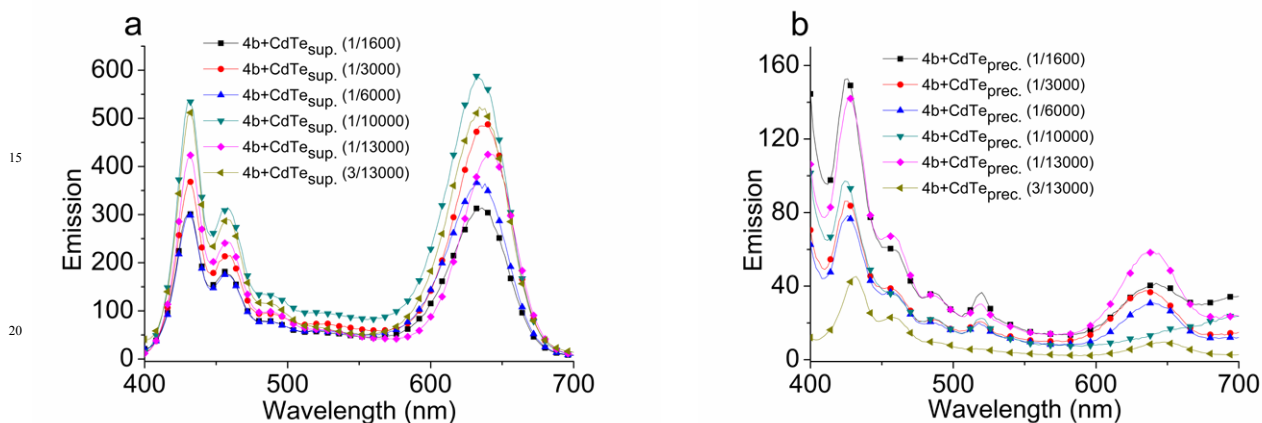

**Figure S2.** Fluorescence spectra of the supernate (a) and the precipitate (b) of the **4b**+CdTe systems ( $C_{4b}$ :  $10^{-4}$  mol/L and  $C_{CdTe}$ :  $6 \times 10^{-5}$  mol/L,  $\lambda_{exc}$ : 380 nm) which were prepared by the precipitation-sonication procedure, followed by centrifugation at different time intervals and velocities (see Table S1).

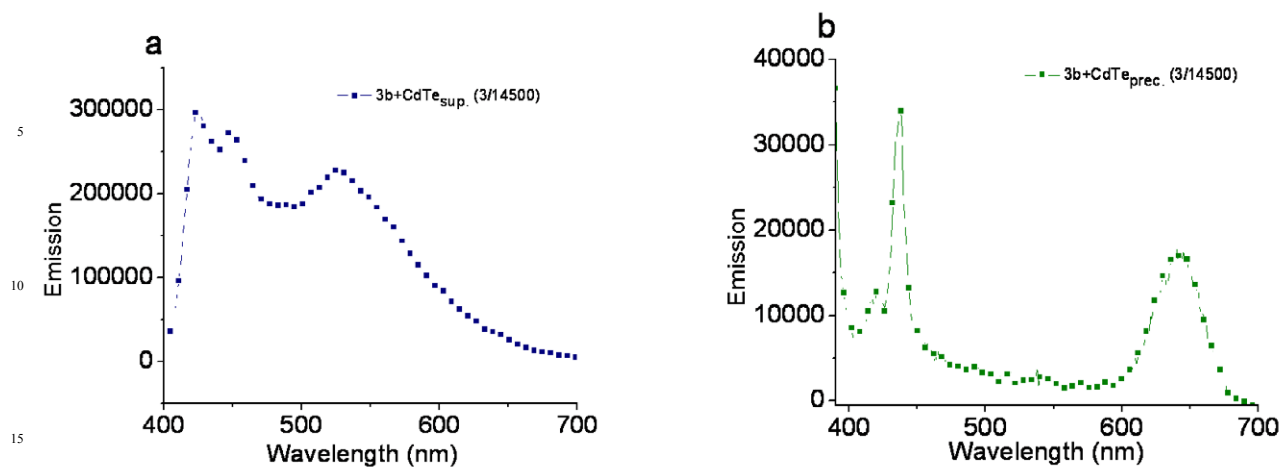

**Figure S3.** Fluorescence spectra of the supernate (a) and the precipitate (b) of the **3b**+CdTe system ( $C_{3b}$ :  $10^{-4}$  mol/L and  $C_{CdTe}$ :  $1 \times 10^{-5}$  mol/L,  $\lambda_{exc}$ : 380 nm) which were prepared by the precipitation-sonication procedure, followed by centrifugation for 3 minutes at a velocity of 14500 revolutions per minute.

## 20 Dynamic light scattering measurements

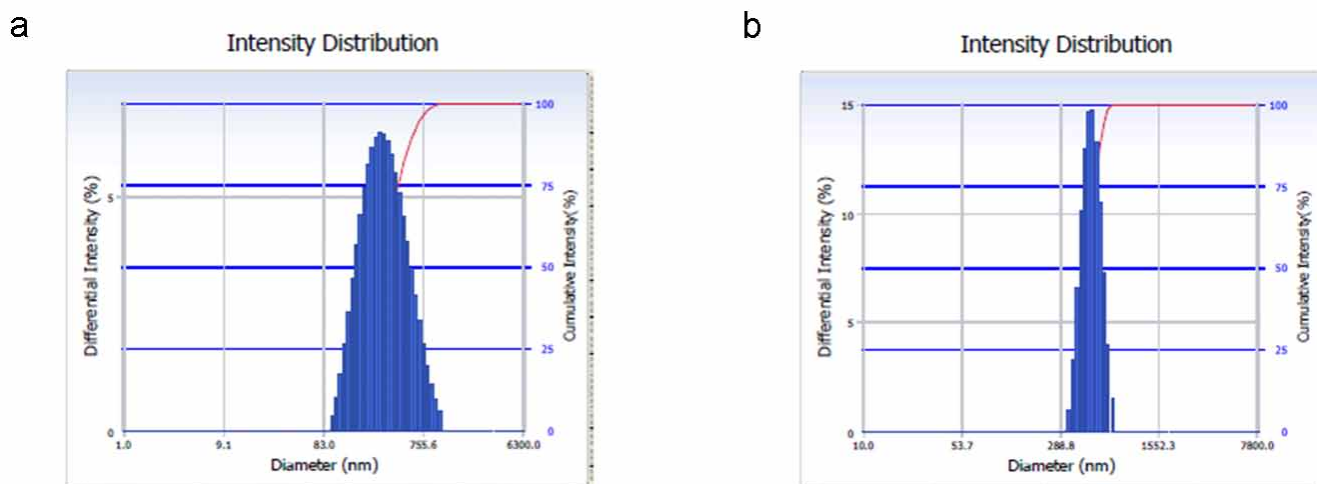

Distribution Results (Contin)

| Peak    | Diameter (nm) | Std. Dev. |
|---------|---------------|-----------|
| 1       | 353.9         | 186.9     |
| 2       | 0.0           | 0.0       |
| 3       | 0.0           | 0.0       |
| 4       | 0.0           | 0.0       |
| 5       | 0.0           | 0.0       |
| Average | 353.9         | 186.9     |

Residual : 8.186e-003 (O.K)

Distribution Results (Contin)

| Peak    | Diameter (nm) | Std. Dev. |
|---------|---------------|-----------|
| 1       | 488.2         | 79.9      |
| 2       | 0.0           | 0.0       |
| 3       | 0.0           | 0.0       |
| 4       | 0.0           | 0.0       |
| 5       | 0.0           | 0.0       |
| Average | 488.2         | 79.9      |

Residual : 1.227e-002 (O.K)

**Figure S4.** Dynamic light scattering measurements of the **3b**+CdTe<sub>red</sub> (a) and **4b**+CdTe<sub>red</sub> (b) composite systems illustrated as intensity distribution plots. The dispersions of the composites were prepared in water using  $10^{-3}$  mol/L polymer concentration and  $1 \times 10^{-4}$  mol/L CdTe concentration.
